# Supplementary material for: A zwitterionic hydrogel with a surprising function of increasing the ionic conductivity of alkali metal chloride or sulfuric acid water-soluble electrolyte
Source: Royal Society of Chemistry journal article supplement (doi:10.1039/d3ta02104a), 2023-01-01
Supplement: d3ta02104a4.pdf [file d3ta02104a4.pdf]

## Supporting Information

### **Zwitterionic hydrogel with a surprised function of increasing the ionic conductivity of alkali metal chloride or sulfuric acid water-soluble electrolyte**

Danchen Fu, Yanfen Lu, Zhiyuan Peng, Wenbin Zhong\*.

College of Materials Science and Engineering, Hunan University, Changsha, 410082,  
P. R. China.

\* Corresponding author. Tel and Fax: 86-0731-88821611.

E-mail address: wbzhong@hnu.edu.cn (W. Zhong)

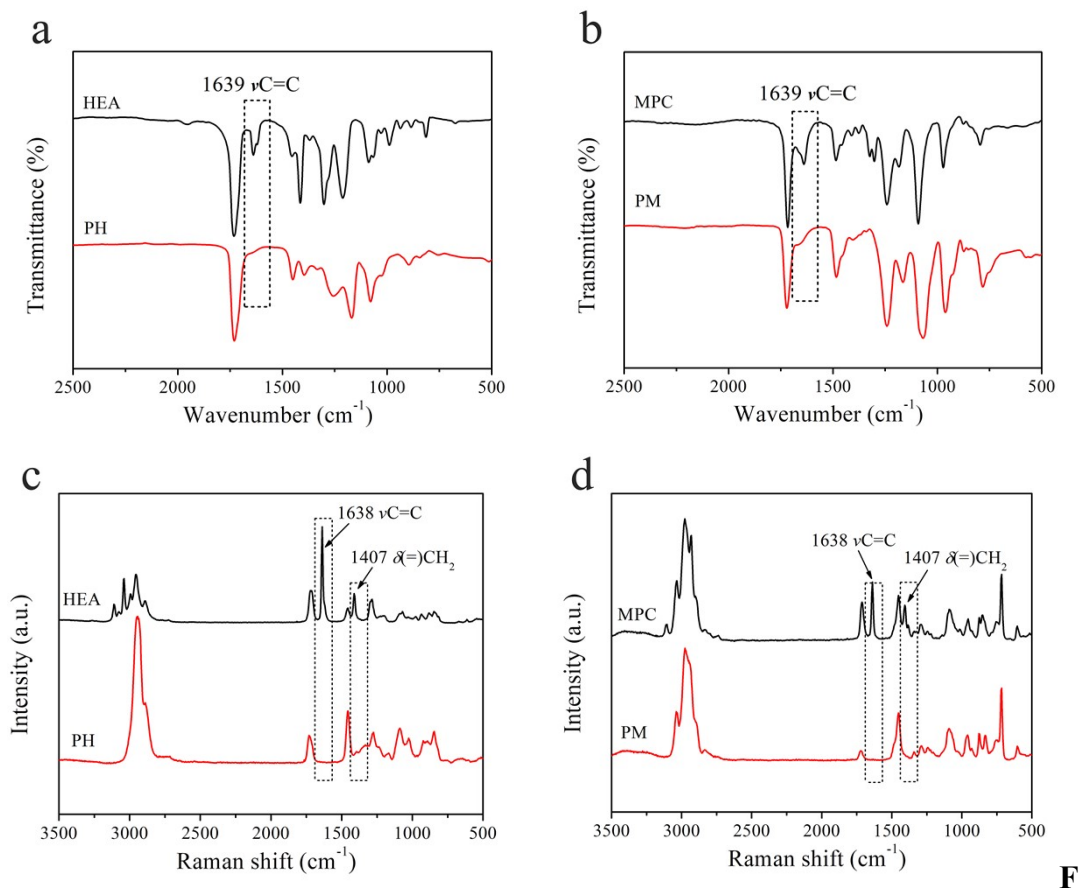

**F**

**ig S1.** FTIR spectra of (a) HEA monomer and PH, (b) MPC monomer and PM. Raman spectra of (c) HEA monomer and PH, (d) MPC monomer and PM.

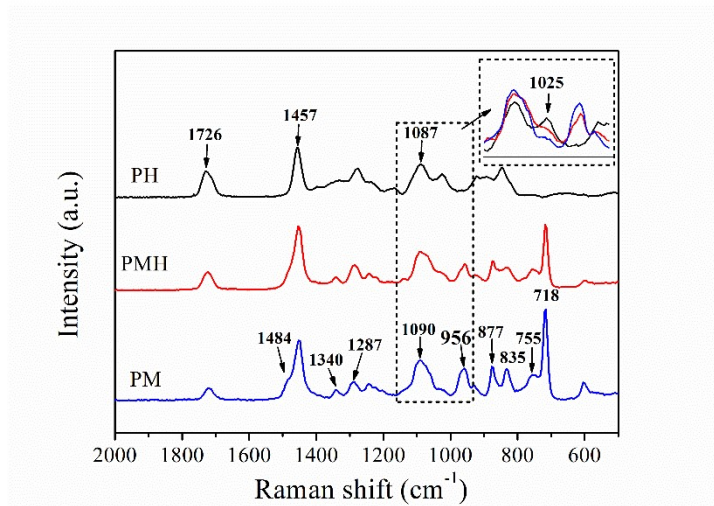

**Fig S2.** Raman spectra of PH, PMH and PM.

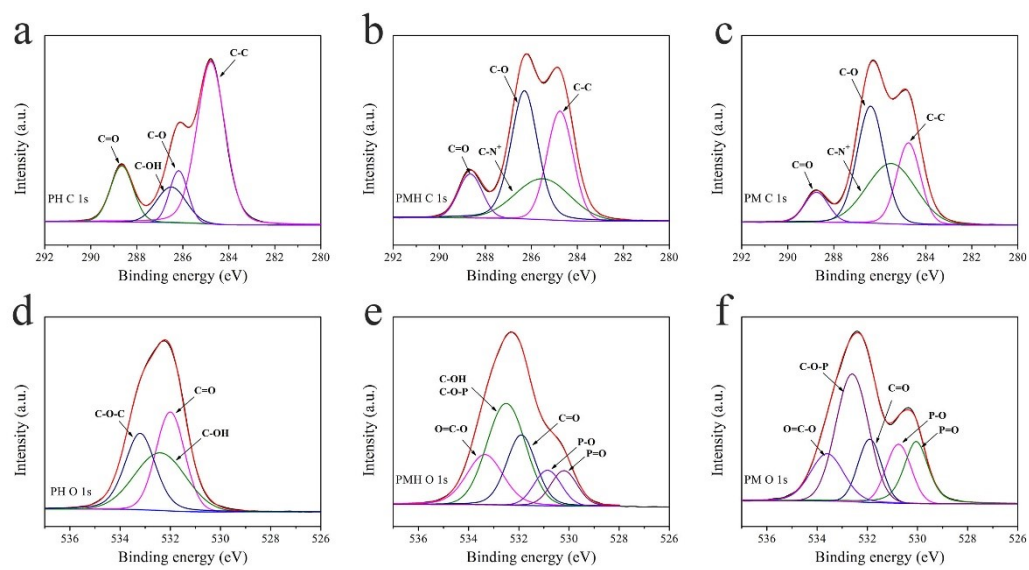

**Fig S3.** The C 1s spectra of (a) PH, (b) PMH and (c) PM. The O 1s spectra of (d) PH, (e) PMH and (f) PM.

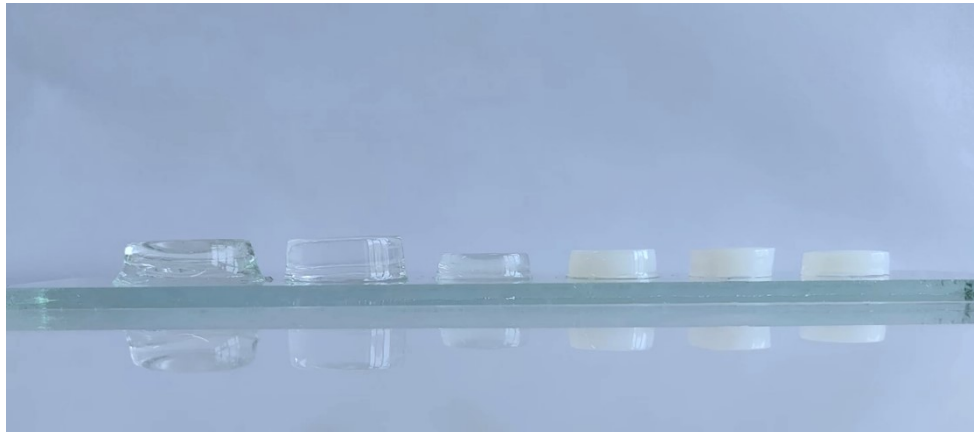

**Fig S4.** The optical photograph of PH electrolyte at different concentration of  $\text{H}_2\text{SO}_4$   
(From left to right: 0.5, 1, 1.5, 2, 2.5, 3 M).

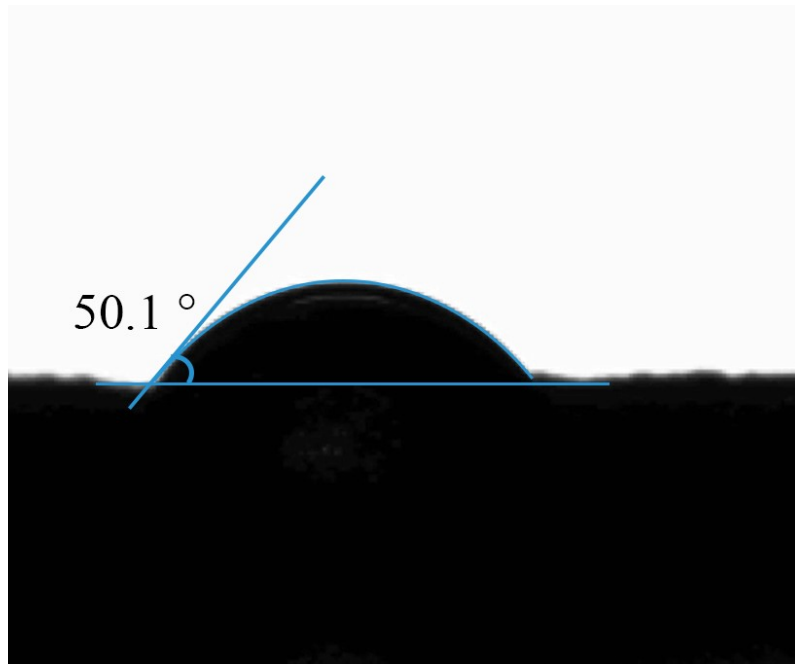

**Fig S5.** Static water contact angles of PH aerogel.

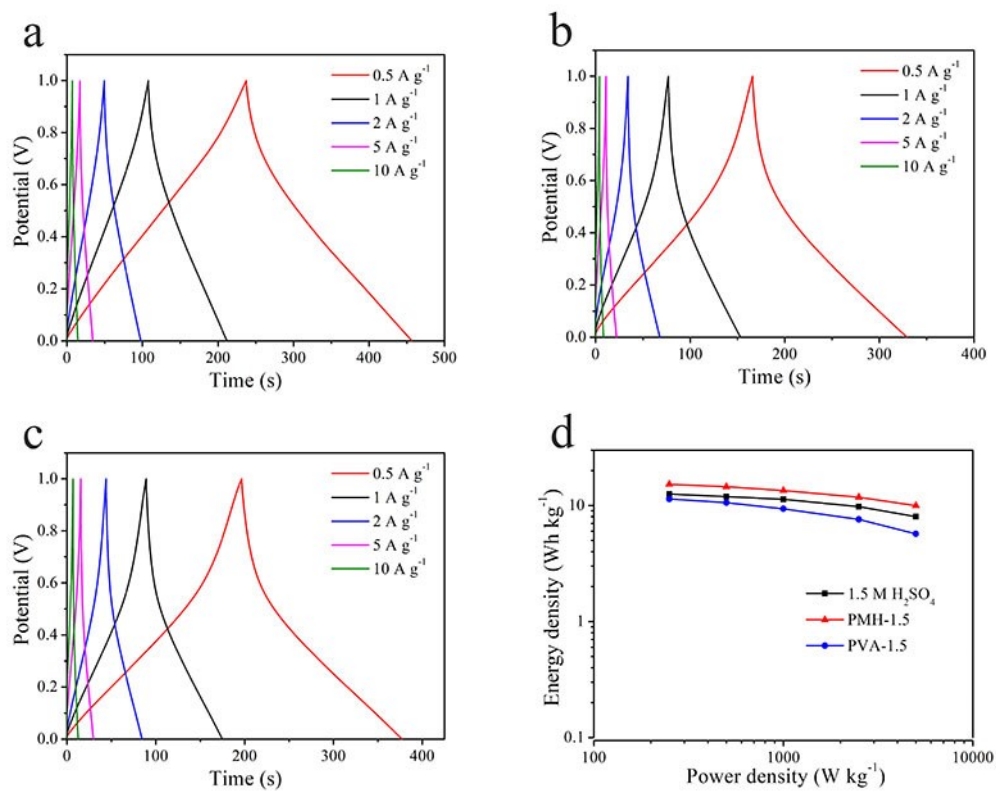

**Fig S6.** Charge/discharge curves of (a) PMH-1.5 SC, (b) PVA-1.5 SC and (c) 1.5 M H<sub>2</sub>SO<sub>4</sub> SC at different current density.

**Table S1.** Overview of the Raman and FTIR band assignments.<sup>1-8</sup>

| Raman shift<br>(cm <sup>-1</sup> ) | Assignments                                                                                                       | FTIR<br>wavenumbers<br>(cm <sup>-1</sup> ) | Assignments                                                                            |
|------------------------------------|-------------------------------------------------------------------------------------------------------------------|--------------------------------------------|----------------------------------------------------------------------------------------|
| 3411                               | $\nu\text{O-H}$                                                                                                   | 3370                                       | $\nu\text{O-H}$                                                                        |
| 2954                               | $\nu_{\text{as}}\text{CH}_2$                                                                                      | 2950                                       | $\nu\text{CH}$ , $\nu\text{CH}_2$ ,<br>$\nu\text{CH}_3$ , $\nu_{\text{as}}\text{CH}_2$ |
| 1726                               | $\text{C=O}$                                                                                                      | 1730                                       | $\text{C=O}$                                                                           |
| 1457                               | $\delta\text{CH}_2$ , $\delta\text{CH}_3$                                                                         | 1453                                       | $\delta\text{CH}_2$ , $\delta\text{CH}_3$                                              |
| 1341                               | $\delta\text{CH}_3$ , $\tau\text{CH}_2$ ,<br>$\omega\text{CH}_2$                                                  | 1396                                       | $\delta\text{CH}_3$ , $\tau\text{CH}_2$ ,<br>$\omega\text{CH}_2$                       |
| 1287                               | $\tau\text{CH}_2$ , $\omega\text{CH}_2$                                                                           | 1260                                       | $\tau\text{CH}_2$ , $\omega\text{CH}_2$                                                |
| 1243                               | $\nu_{\text{as}}\text{CC(=O)O}$                                                                                   | 1223                                       | $\nu_{\text{as}}\text{CC(=O)O}$                                                        |
| 1087                               | $\nu_{\text{s}}\text{PO}_2$ ,<br>$\nu_{\text{as}}\text{OCH}_2\text{C}$ ,<br>$\rho\text{CH}_2$ , $\rho\text{CH}_3$ | 1168                                       | $\nu_{\text{as}}\text{COC}$                                                            |
| 1025                               | $\nu\text{CC}$ , $\nu\text{CO(H)}$                                                                                | 1080                                       | $\nu_{\text{as}}\text{OCH}_2\text{C}$ ,<br>$\rho\text{CH}_2$ , $\rho\text{CH}_3$       |
| 957                                | $\rho\text{CH}_3$                                                                                                 | 966                                        | $\rho\text{CH}_3$                                                                      |
| 895                                | $\nu_{\text{s}}\text{CCO(H)}$                                                                                     | 897                                        | $\nu\text{CO(H)}$                                                                      |
| 877                                | $\rho\text{CH}_2$ , $\nu_{\text{s}}\text{CN}^+$                                                                   | 790                                        | $\nu_{\text{s}}\text{OPO}$                                                             |
| 850                                | $\rho\text{CH}_2$                                                                                                 | 602                                        | $\nu\text{CCO}$                                                                        |
| 835                                | $\nu_{\text{s}}\text{COC}$ ,<br>$\nu_{\text{as}}\text{POC}$                                                       |                                            |                                                                                        |
| 718                                | $\nu_{\text{s}}\text{CN}^+$                                                                                       |                                            |                                                                                        |
| 603                                | $\nu_{\text{s}}\text{CCO}$                                                                                        |                                            |                                                                                        |



**Table S2.** The relative elemental contents (at.%) of PH, PMH and PM.

| Samples | C (at.%) | O (at.%) | N (at.%) | P (at.%) |
|---------|----------|----------|----------|----------|
| PH      | 67.40    | 32.60    |          |          |
| PMH     | 61.58    | 31.42    | 3.18     | 3.82     |
| PM      | 61.64    | 28.89    | 4.32     | 5.15     |

**Table S3.** Relative ratio (at.%) of different carbon components in PH, PMH and PM.

From C 1s XPS spectra which were calculated based on the areas of the XPS peaks.

| Samples | ~284.8 eV<br>(C-C) | ~285.5 eV<br>(C-N) | ~286.2 eV<br>(C-OH) | ~286.5 eV<br>(C-O) | ~288.7 eV<br>(C=O) |
|---------|--------------------|--------------------|---------------------|--------------------|--------------------|
| PH      | 60.09              |                    | 11.44               | 12.7               | 15.77              |
| PMH     | 29.20              | 21.65              |                     | 38.69              | 10.46              |
| PM      | 22.54              | 33.00              |                     | 36.67              | 7.79               |

**Table S4.** Relative ratio (at.%) of different oxygen components in PH.

| Samples | ~532.0 eV<br>(C=O) | ~532.4 eV<br>(C-OH) | ~533.2 eV<br>(C-O) |
|---------|--------------------|---------------------|--------------------|
| PH      | 34.38              | 34.58               | 31.04              |

**Table S5.** Relative ratio (%) of different oxygen components in PMH and PM.

| Samples | ~530.1 eV<br>(P=O) | ~530.8 eV<br>(P-O <sup>-</sup> ) | ~531.9 eV<br>(C=O) | ~532.6 eV<br>(C-O-P(H)) | ~533.6 eV<br>(C-O) |
|---------|--------------------|----------------------------------|--------------------|-------------------------|--------------------|
| PMH     | 9.83               | 9.43                             | 25.19              | 41.61                   | 13.94              |
| PM      | 16.96              | 13.88                            | 14.04              | 39.35                   | 15.77              |

**Table S6.** Summary of ionic conductivity of different hydrogel electrolyte.

| hydrogel electrolyte                                   | ionic conductivity (S m <sup>-1</sup> ) | Refs.     |
|--------------------------------------------------------|-----------------------------------------|-----------|
| SBMA/HEA/LiCl                                          | 14.6                                    | 9         |
| polypyrrole imbibed<br>poly(HEA)/poly(ethylene glycol) | 2.1                                     | 2         |
| Zw-PSBMA-EG/MgCl <sub>2</sub>                          | 13.7                                    | 10        |
| PVA-g-PAA/KCl                                          | 4.1                                     | 11        |
| PDMP-Li GPE                                            | 8.9×10 <sup>-1</sup>                    | 12        |
| PAAm/LiCl                                              | 8.1                                     | 13        |
| PAM/PBA-IL/CNF                                         | 0.7                                     | 14        |
| 50:50 P(AMPSLi-c-DMAA)                                 | 5.7×10 <sup>-2</sup>                    | 15        |
| PAAm/gelatin/LiCl                                      | 8.3                                     | 16        |
| P(VI-co-HPA)/NaNO <sub>3</sub>                         | 6.0                                     | 17        |
| PAO/PEI/LiCl                                           | 19.1                                    | 18        |
| PAMPS/PAAm/LiCl/ethylene glycol                        | 2.3                                     | 19        |
| PVA/PAM-ILs                                            | 0.7                                     | 20        |
| PVA-GB                                                 | 7.0                                     | 21        |
| PVA-H <sub>2</sub> SO <sub>4</sub>                     | 8.2                                     | 22        |
| Alg/PVA/ZnSO <sub>4</sub>                              | 1.5                                     | 23        |
| PMH-LiCl                                               | 32.0                                    | This work |
| PMH-NaCl                                               | 35.5                                    | This work |
| PMH-KCl                                                | 38.9                                    | This work |
| PMH-1.5 H <sub>2</sub> SO <sub>4</sub>                 | 64.8                                    | This work |

## References

- 1 K. Filipecka, R. Miedziński, M. Sitarz, J. Filipecki and M. Makowska-Janusik, *Spectrochim. Acta A Mol. Biomol.*, 2017, **176**, 83–90.
- 2 Q. Li, X. Chen, Q. Tang, H. Cai, Y. Qin, B. He, M. Li, S. Jin and Z. Liu, *J. Power Sources*, 2014, **248**, 923-930.
- 3 P. Taddei, F. Balducci, R. Simoni and P. Monti, *J. Mol. Struct.*, 2005, **744-747**, 507–514.
- 4 A. Bertoluzza, P. Monti, J.V. Garcia-Ramos, R. Simoni, R. Caramazza and A. Calzavara, *J. Mol. Struct.*, 1986, **143**, 469-472.
- 5 Y. Koyama, S. Toda and Y. Kyogoku, *Chem. Phys. Lipids*, 1977, **19**, 74-92.
- 6 D. Das, H. Cho, N. Kim, T.T.H. Pham, I.G. Kim, E.-J. Chung and I. Noh, *Carbohydr. Polym.*, 2019, **207**, 628–639.
- 7 R.C.S. JR and I. W. Levin, *Biochim. Biophys. Acta*, 1975, **388**, 361-373.
- 8 H. Macková, Z.k. Plichta, H. Hlídková, O.e. Sedláček, R. Konefal, Z. Sadakbayeva, M. Dušková-Smrčková, D. Horák and S.a.r. Kubinova, *ACS Appl. Mater. Interfaces*, 2017, **9**, 10544–10553.
- 9 J. Yang, Z. Xu, J. Wang, L. Gai, X. Ji, H. Jiang and L. Liu., *Adv. Funct. Mater.*, 2021, **31**, 2009438.
- 10 C.-J. Lee, H. Wu, Y. Hu, M. Young, H. Wang, D. Lynch, F. Xu and H. Cong, G, *ACS Appl. Mater. Interfaces*, 2018, **10**, 5845–5852.
- 11 Z. Wang, F. Tao and Q. Pan, *J. Mater. Chem. A*, 2016, **4**, 17732.
- 12 Y. Wang, J. Qiu, J. Peng, J. Li and M. Zhai, *J. Mater. Chem. A*, 2017, **5**, 12393.
- 13 H. Li, T. Lv, N. Li, Y. Yao, K. Liu and T. Chen, *Nanoscale*, 2017, **9**, 18474.
- 14 X. Yao, S. Zhang, L. Qian, N. Wei, V. Nica, S. Coseri and F. Han, *Adv. Funct. Mater.*, 2022, **32**, 2204565.
- 15 C. Tiyaipoonchaiya, J.M. Pringle, J. Sun, N. Byrne, P.C. Howlett, D.R. MacFarlane and M. Forsyth., *Nat. Mater.*, 2004, **3**, 29-32.
- 16 Y. Zhang, Y. Dai, F. Xia and X. Zhang, *Nano Energy*, 2022, **104**, 107977.
- 17 J. Wang, F. Liu, F. Tao and Q. Pan, *ACS Appl. Mater. Interfaces*, 2017, **9**, 27745–27753.
- 18 X. Guo, Y. Lu, D. Fu, C. Yu, X. Yang and W. Zhong, *Chem. Eng. J.*, 2023, **452**,

- 139208.
- 19 X. Li, D. Lou, H. Wang, X. Sun, J. Li and Y.-N., *Adv. Funct. Mater.*, 2020, **30**, 2007291.
  - 20 S. Wang, D. Zhang, X. He, J. Yuan, W. Que, Y. Yang, I. Protsak, X. Huang, C. Zhang, T. Lu, P. Pal, S. Liu, S.Y. Zheng and J. Yang, *Chem. Eng. J.*, 2022, **438**, 135607.
  - 21 K.-P. Wang, Y. Yang, Q. Zhang, Z. Xiao, L. Zong, T. Ichitsubo and L. Wang, *Mater. Chem. Front.*, 2021, **5**, 5106-5114.
  - 22 K. Wang, X. Zhang, C. Li, X. Sun, Q. Meng, Y. Ma and Z. Wei., *Adv. Mater.*, 2015, **27**, 7451–7457.
  - 23 W. Cui, Y. Zheng, R. Zhu, Q. Mu, X. Wang, Z. Wang, S. Liu, M. Li and R. Ran, *Adv. Funct. Mater.*, 2022, **32**, 2204823.
